# Supplementary material for: Low Doses of Silver Nanoparticles Selectively Induce Lipid Peroxidation and Proteotoxic Stress in Mesenchymal Subtypes of Triple-Negative Breast Cancer
Source: MDPI journal article supplement (doi:10.3390/cancers13164217), 2021-08-22

**Figure 4: Uncropped Western Blots**

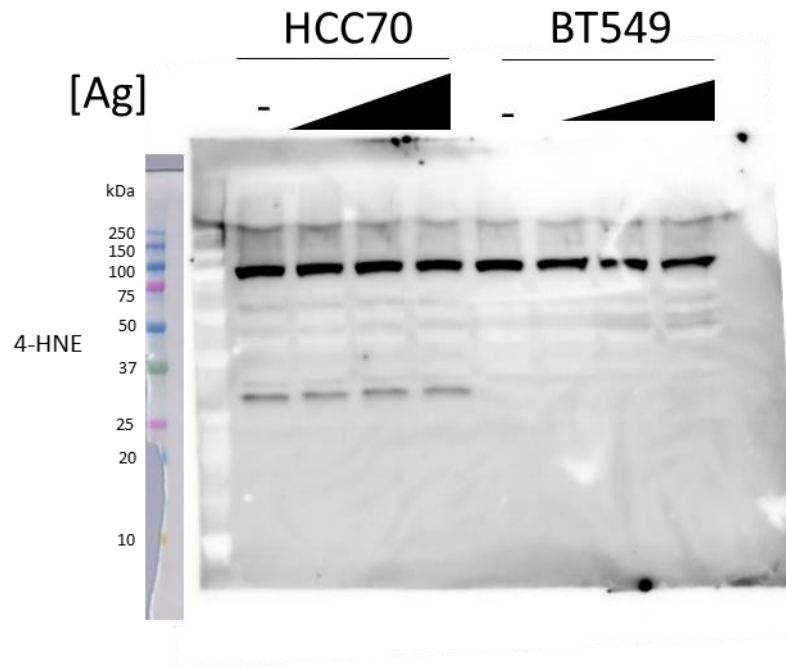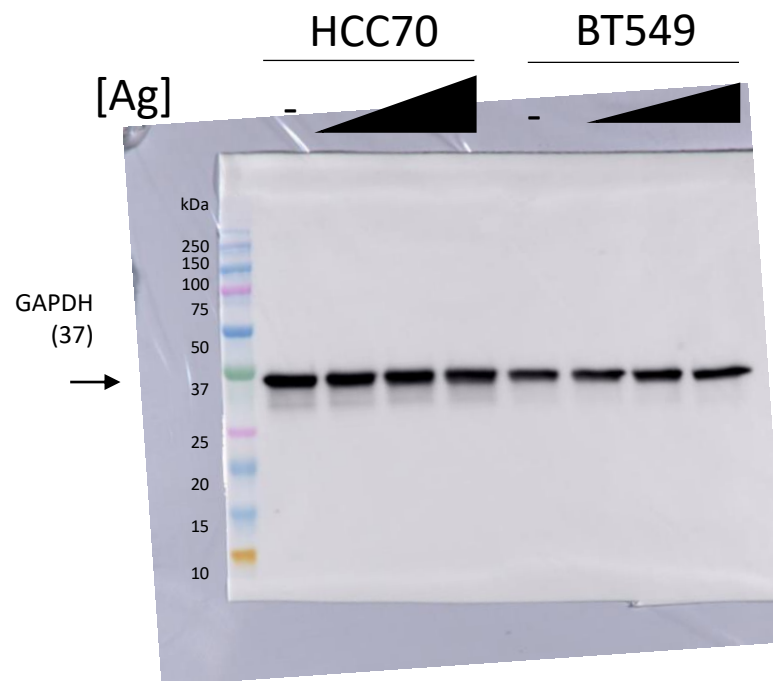

**Figure 5 Uncropped Western Blots- Part 1**

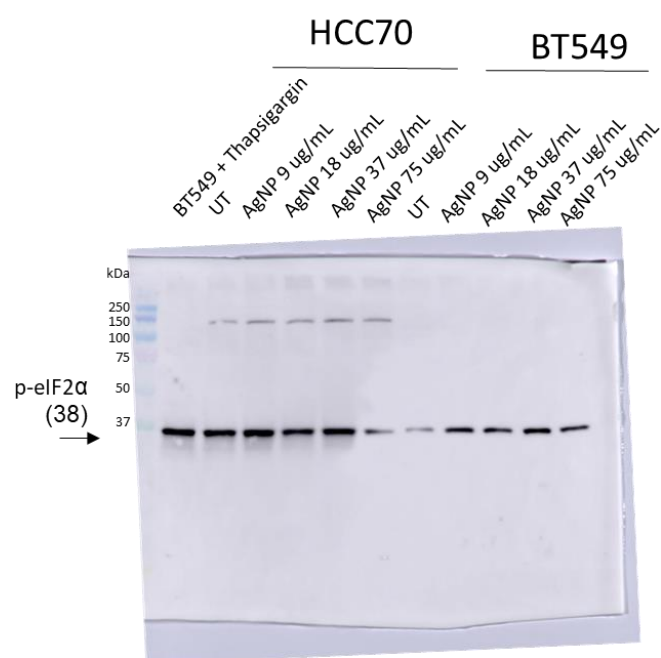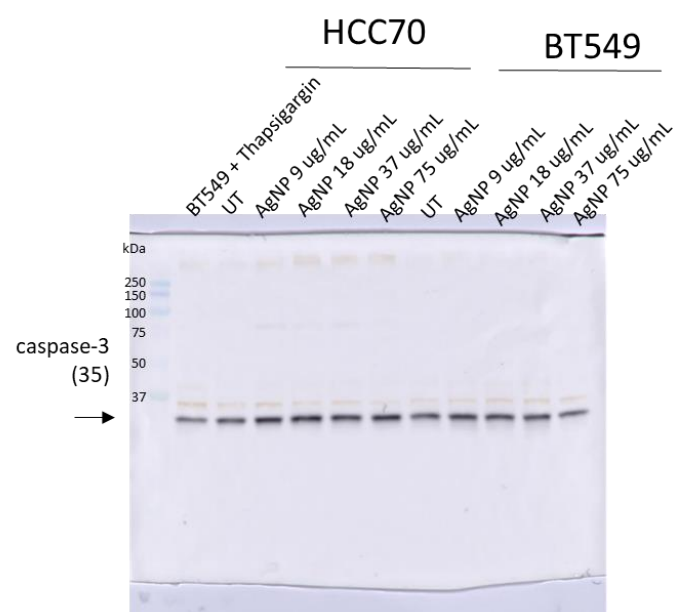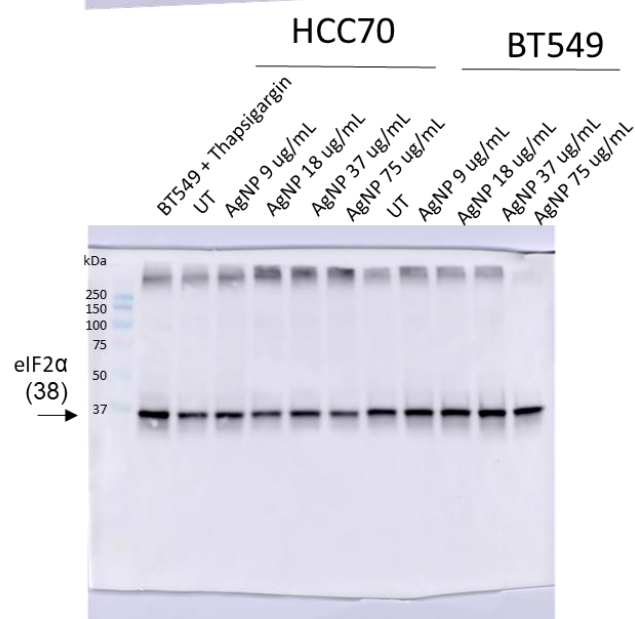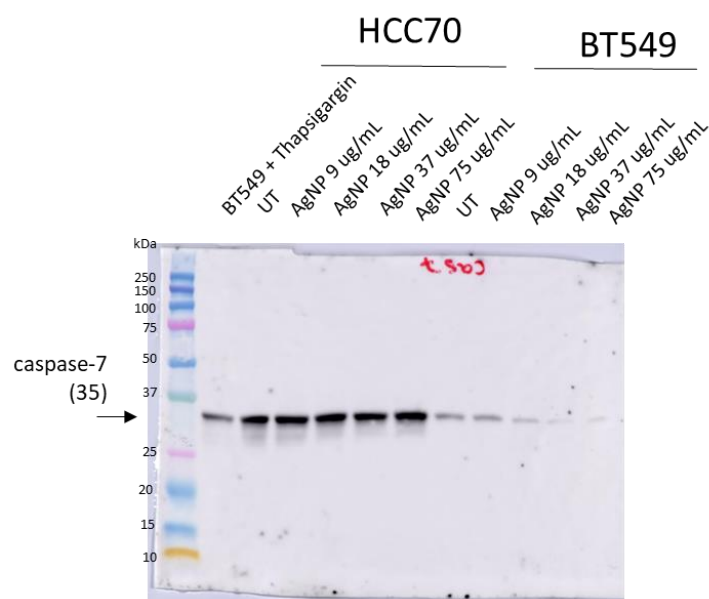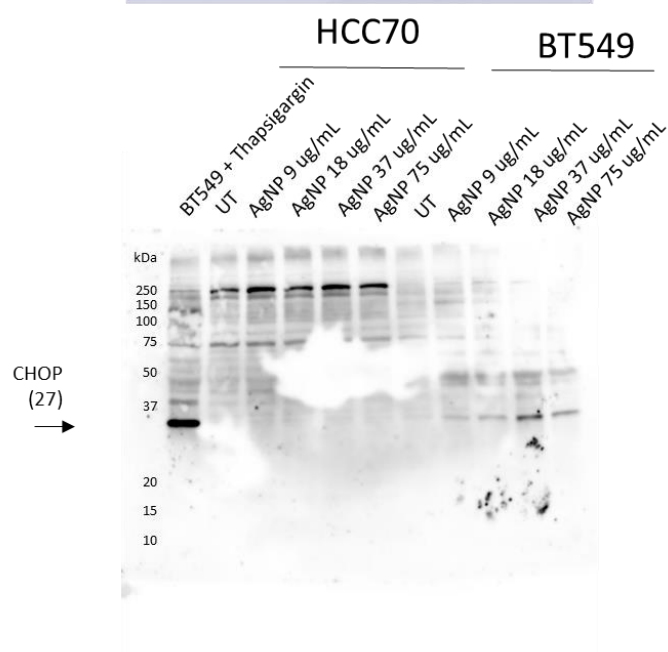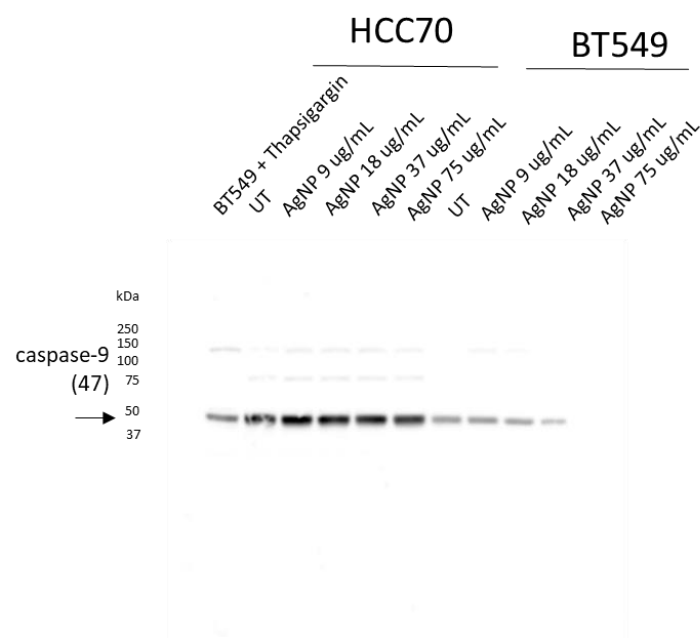

**Figure 5 Uncropped Western Blots- Part 2**

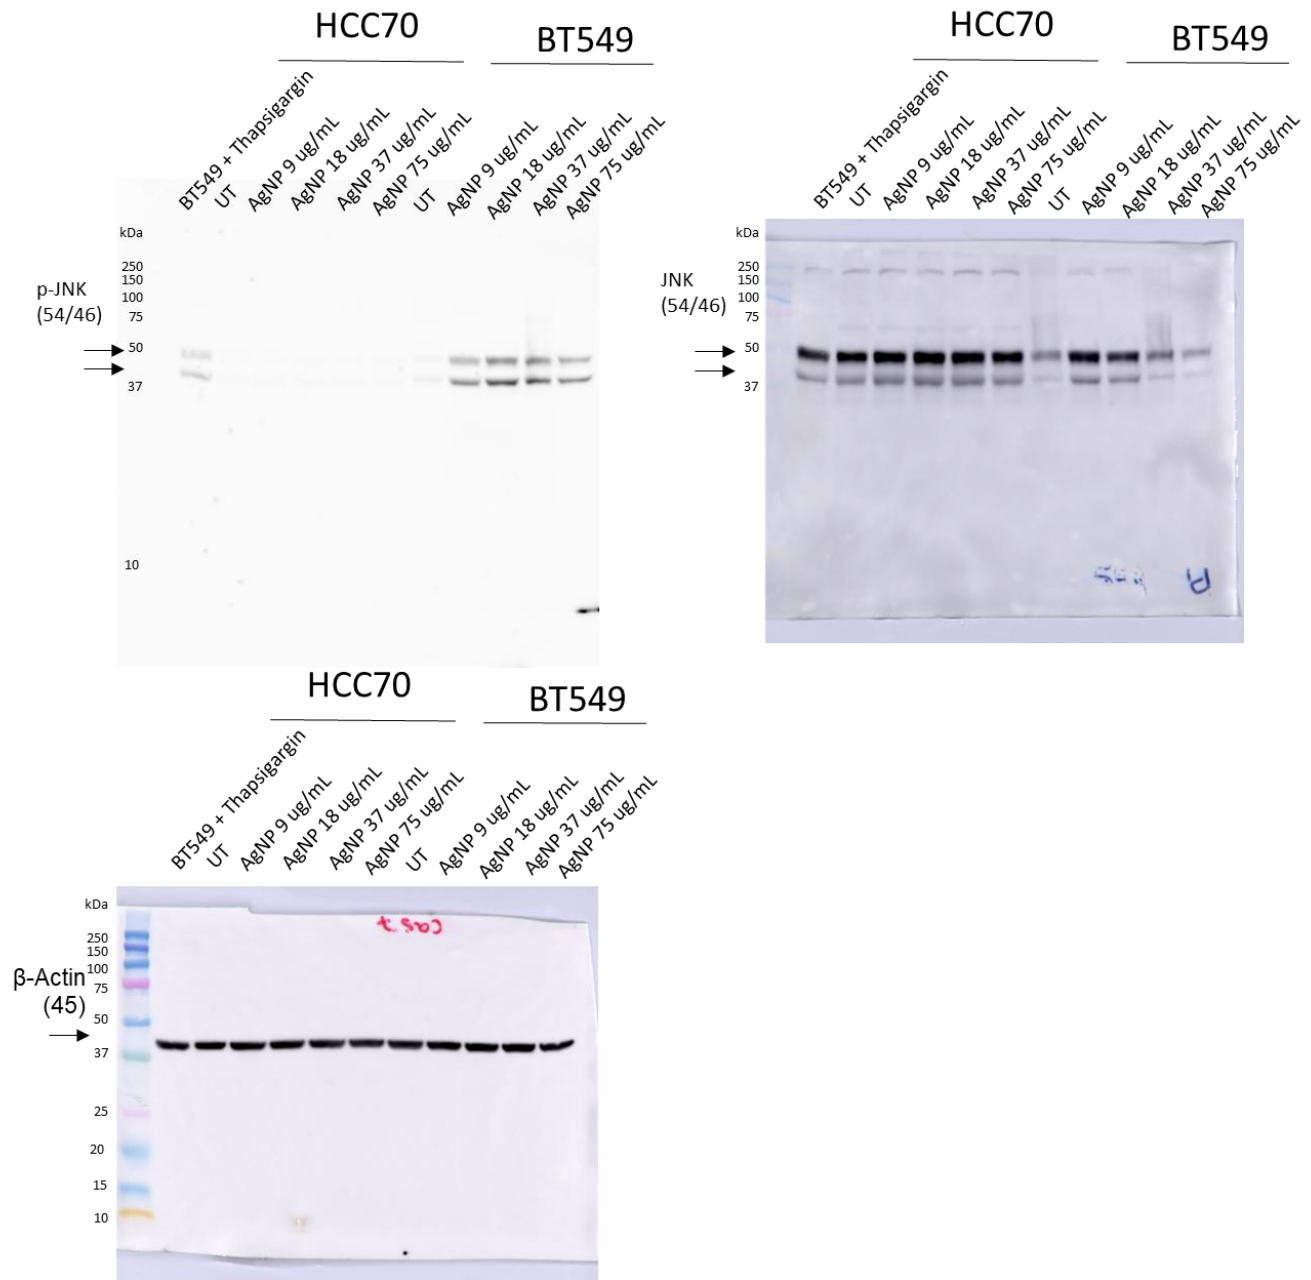

# Supplementary Figure S2: Uncropped Western Blots Part 1

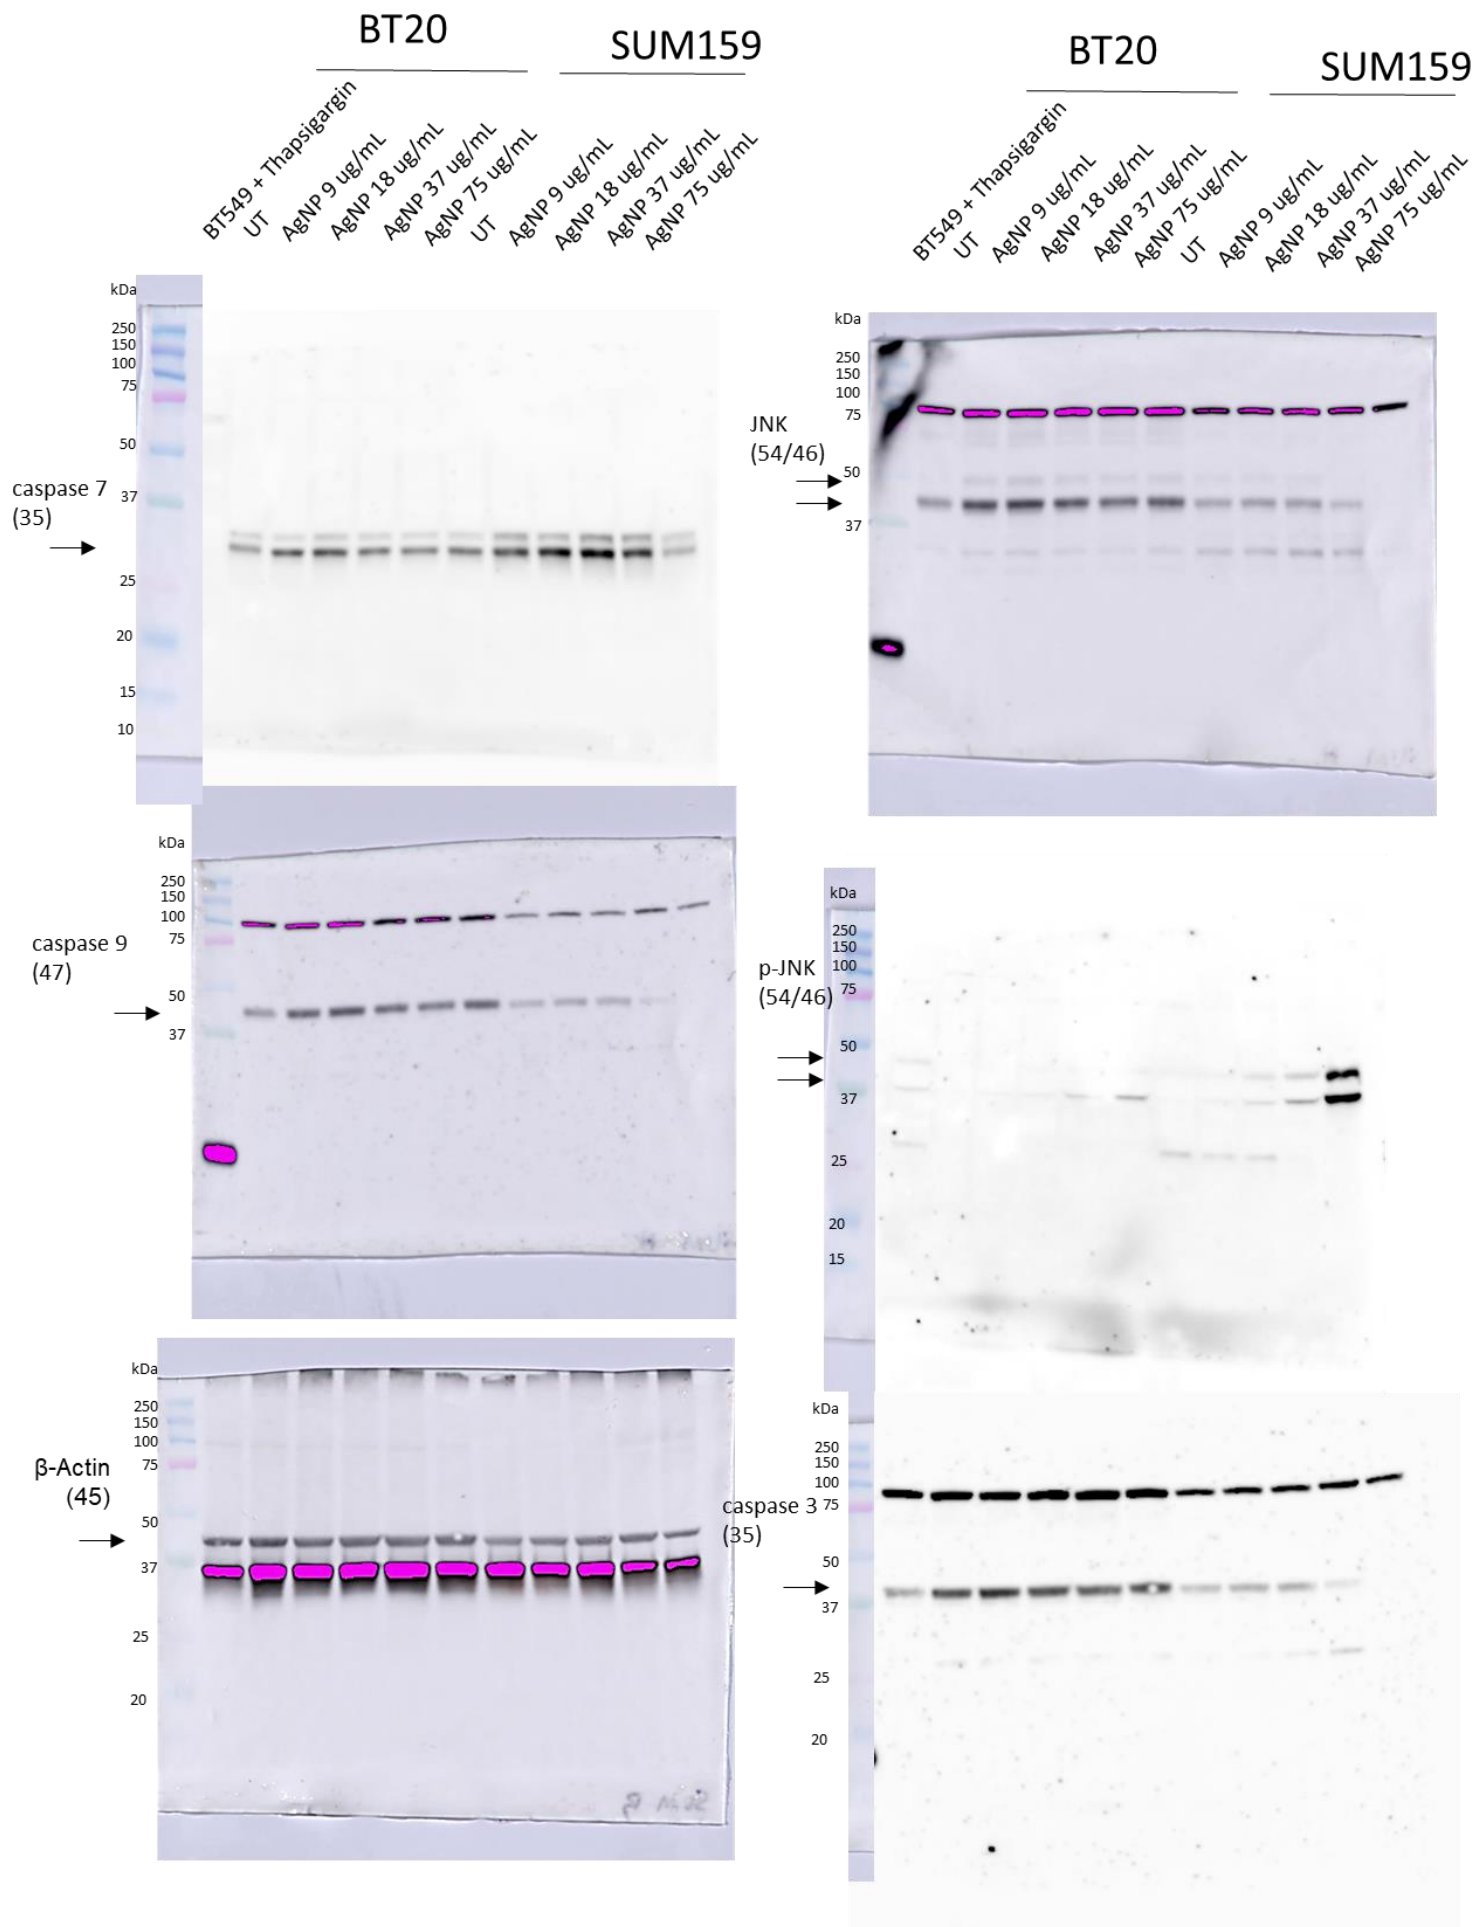

# Supplementary Figure S2: Uncropped Western Blots Part 2

MDA MB 231

AgNP ( $\mu\text{g/mL}$ )

18.75 37.5 75

TPG CTRL 3 h 24 h 3 h 24 h 3 h 24 h

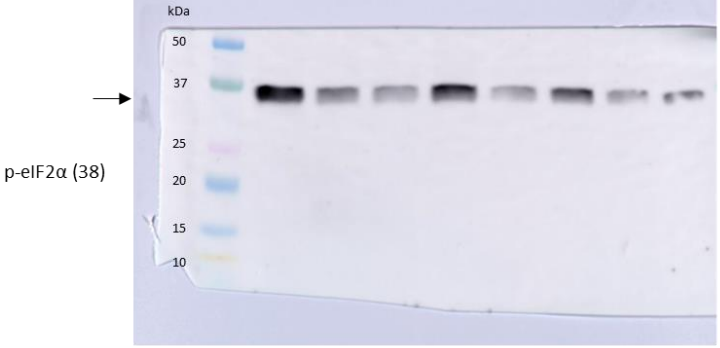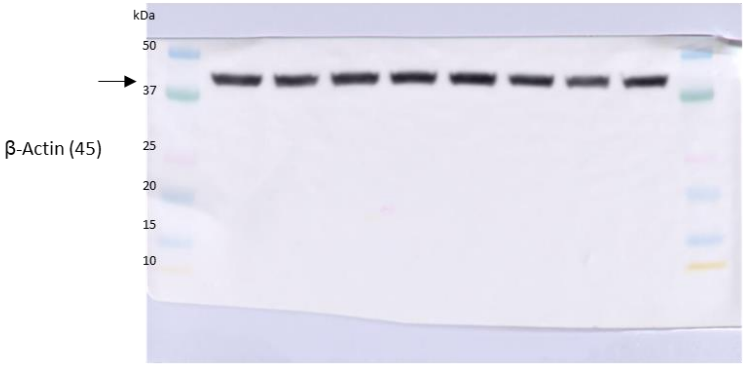

BT549

AgNP ( $\mu\text{g/mL}$ )

18.75 37.5 75

CTRL TPG 3 h 24 h 3 h 24 h 3 h 24 h

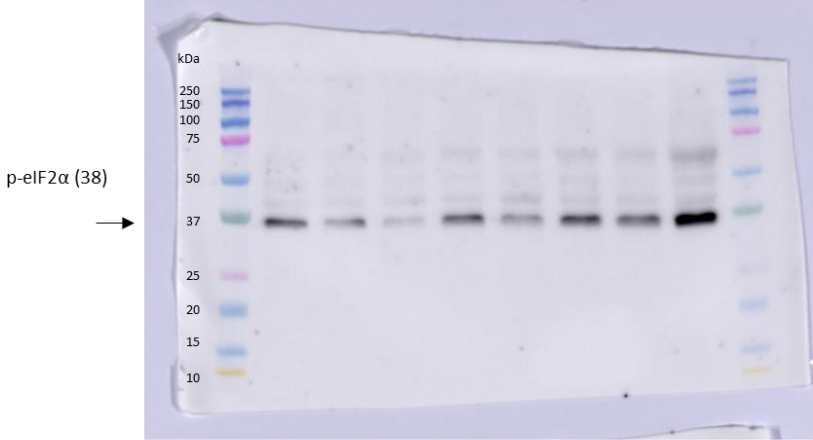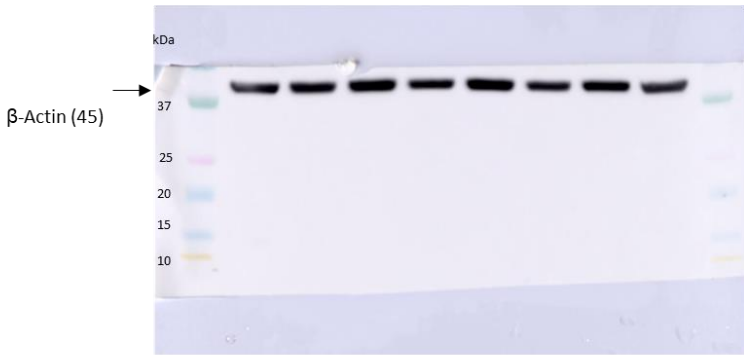

HCC70

BT549

[Ag]

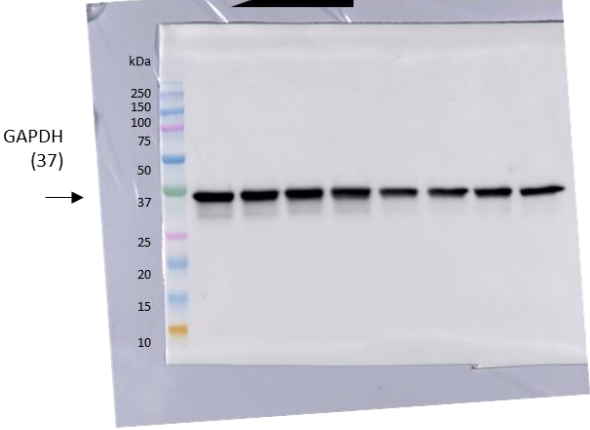

HCC70

BT549

[Ag]

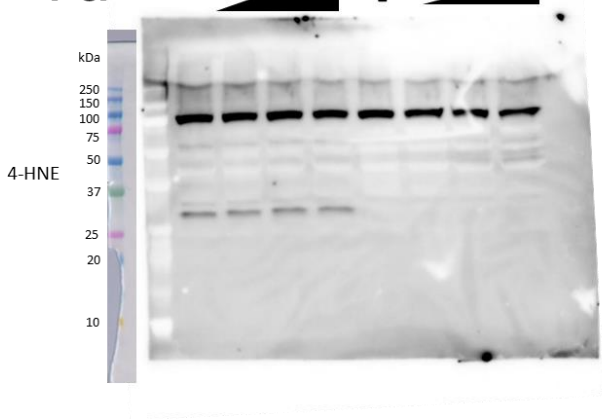

Supplement: s1 [file s1]
