# Supplementary material for: Low Doses of Silver Nanoparticles Selectively Induce Lipid Peroxidation and Proteotoxic Stress in Mesenchymal Subtypes of Triple-Negative Breast Cancer
Source: MDPI journal article supplement (doi:10.3390/cancers13164217), 2021-08-22
Supplement: s1 [file s1]

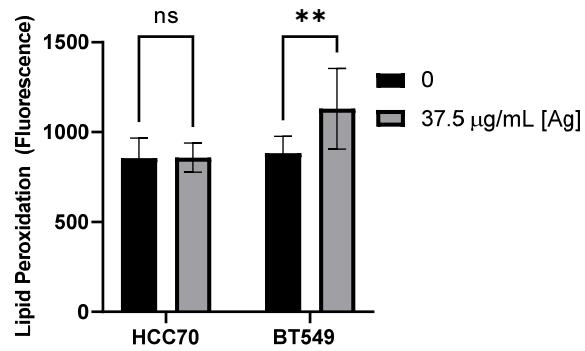

**Figure S1.** *AgNPs induce lipid peroxidation in CLBC but not BLBC.* To assess lipid peroxidation, cells were treated with AgNPs for 24 hours, stained with Liperfluor, and fluorescence was assessed by flow cytometry. Data were obtained from 3 biological replicates per condition and 3 independent experiments. Statistical analysis was performed by two-way ANOVA followed by post-hoc Tukey test. Significant differences are indicated (\*\* $p < 0.01$ ).

**A**

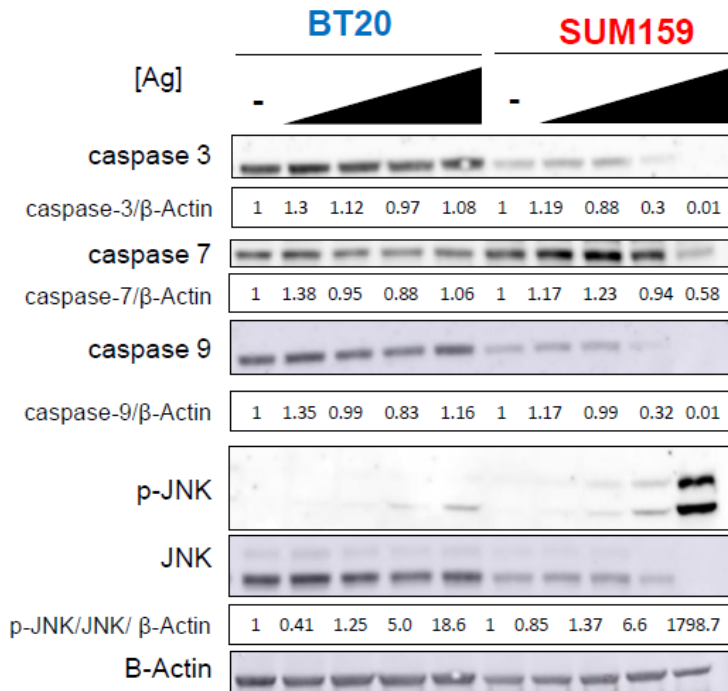

**B**

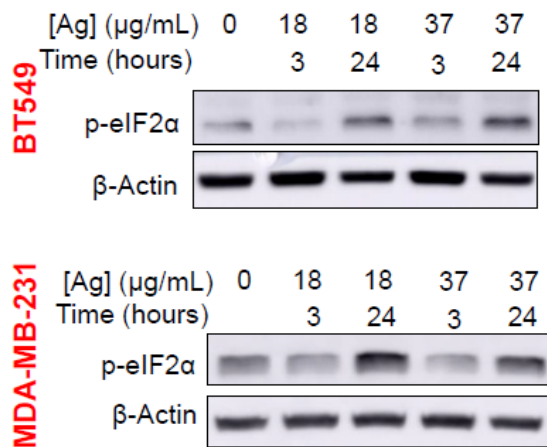

**C**

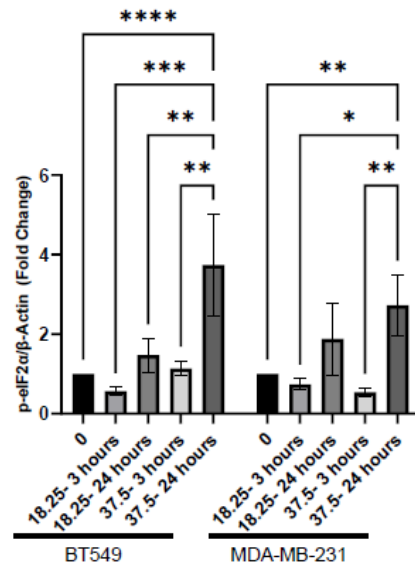

**Figure S2.** AgNPs induce time dependent activation of proteotoxic stress responses in CLBC cells. **(A)** BLBC (blue) and CLBC (red) cells were treated with (left to right) 0, 9.375, 18.75, 37.5, or 75  $\mu$ g/mL AgNPs for 24 hours and protein expression was evaluated by western blot. **(B)** CLBC cells (red) were treated with 0, 18.25, or 37.5  $\mu$ g/mL AgNPs for 3 or 24 hours and protein expression was evaluated by western blot. **(C)** Densitometry was performed on at least three independent experiments per cell line and the ratio of p-eIF2 $\alpha$  to  $\beta$ -actin is shown. Statistical analysis was performed by two-way ANOVA followed by post-hoc Tukey test. Significant differences are indicated (\*\*\*\*p<0.0001, \*\*\*p<0.001, \*\*p<0.01, \*p<0.05).
